# Supplementary material for: A surface modification strategy to prepare hierarchical Beta molecular sieves for glucose dehydration
Source: Royal Society of Chemistry journal article supplement (doi:10.1039/d3dt01538f), 2023-01-01
Supplement: d3dt01538f1.pdf [file d3dt01538f1.pdf]

## **A Surface Modification Strategy to Prepare Hierarchical Beta Molecular Sieves for Glucose Dehydration**

Zhongxu Wang<sup>a</sup>, Peng Lu<sup>a</sup>, Shuo li<sup>b</sup>, Yuling Shan<sup>a</sup>, Lu Li<sup>a</sup>, Xiaosheng Wang<sup>c</sup>, Shuwei Liu<sup>d</sup>, Lei Han<sup>d</sup>,

Shiwei Liu<sup>a, e</sup>, Yuxiang Liu<sup>1, \*</sup>

<sup>a</sup> State Key Laboratory Base of Eco-chemical Engineering, College of Chemical Engineering, Qingdao University of Science and Technology, Qingdao, China

<sup>b</sup> College of Chemistry & Chemical Engineering, Yantai University, Yantai 264005, China

<sup>c</sup> State Key Laboratory of Heavy Oil Processing, China University of Petroleum-Beijing, Beijing, China

<sup>d</sup> Hydrocarbon High-efficiency Utilization Technology Research Center, Shaanxi Yanchang Petroleum (Group) Corp. Ltd., Xi'an,

China

<sup>e</sup> State Key Laboratory of Efficient Utilization of Coal and Green Chemical Industry, Ningxia 750021, China

---

\*Corresponding author. E-mail addresses: liuyx@qust.edu.cn.

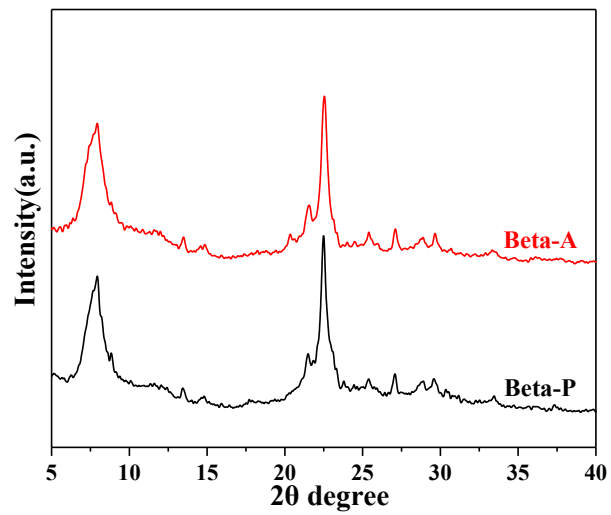

**Fig. S1. XRD patterns of Beta-P and Beta-A.**

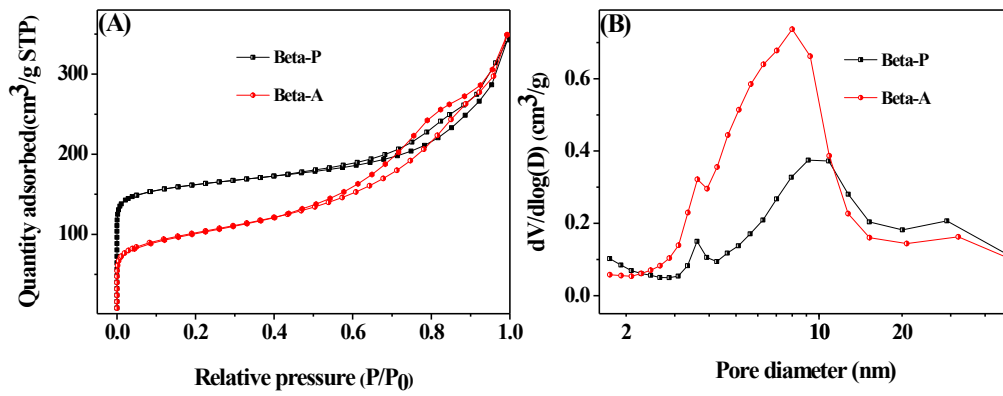

Fig. S2. N<sub>2</sub> adsorption-desorption isotherms (A) and BJH pore width distribution curves (B) of Beta-P and Beta-A. These data were obtained from previous published research. The DOI of previous research: [10.1039/d1cy00019e](https://doi.org/10.1039/d1cy00019e).

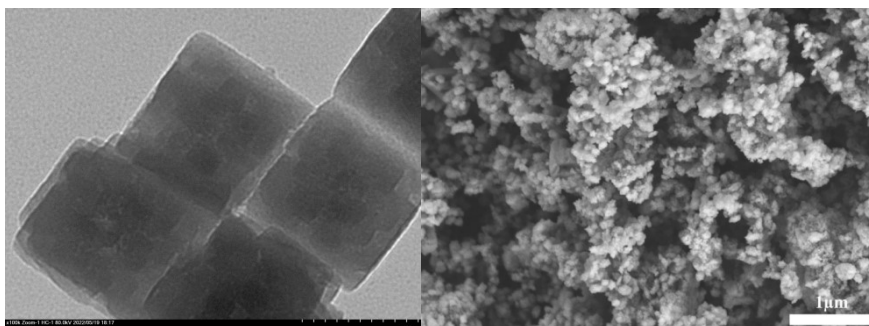

Fig. S3. TEM (left) and SEM (right) images of Beta-P.

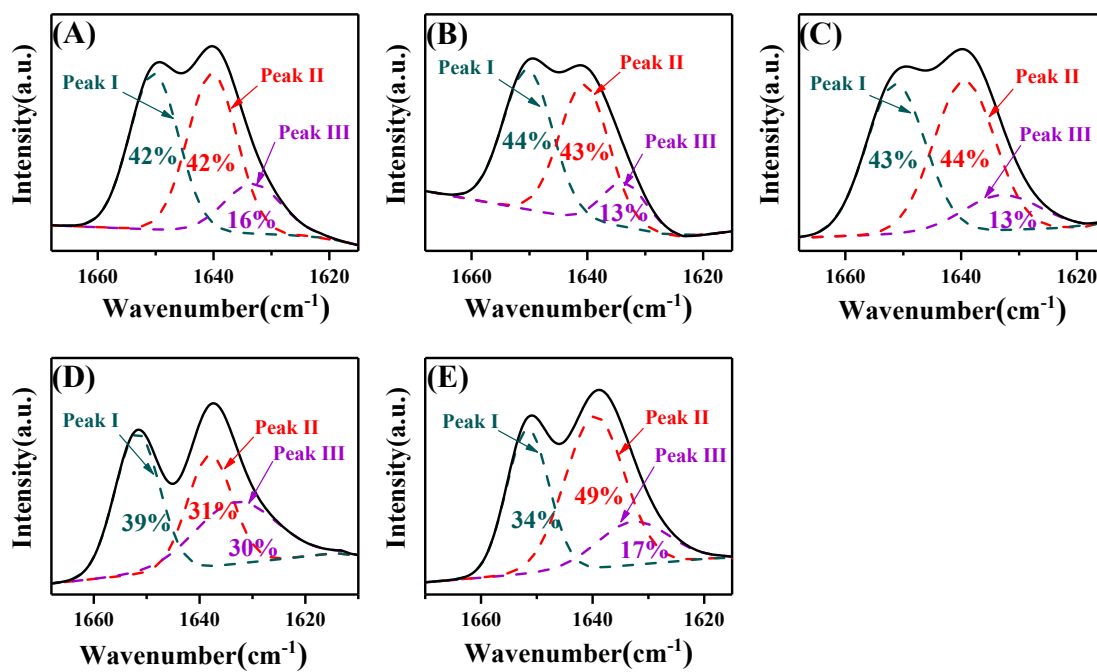

Fig. S4. Fitting results of collidine adsorbed FTIR spectra of Beta-PyC (A), Beta-DPyC (B), Beta-TPyC (C), Beta-P (D), and Beta-A (E).

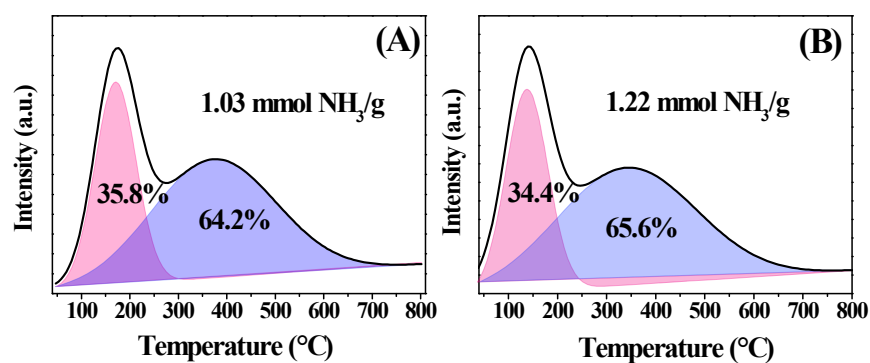

Fig. S5. Fitted  $\text{NH}_3$ -TPD spectra of Beta-P (A) and Beta-A (B). The total amount of acid sites is inserted in figures. Weak and strong acid sites are defined based on the desorption temperature of  $\text{NH}_3$ . When desorption temperature is  $<300\text{ }^{\circ}\text{C}$  and  $>300\text{ }^{\circ}\text{C}$ , corresponding acid sites are weak and strong acid sites, respectively.

These data were obtained from our previous research. DOI number is 10.1016/j.fuel.2022.123534.

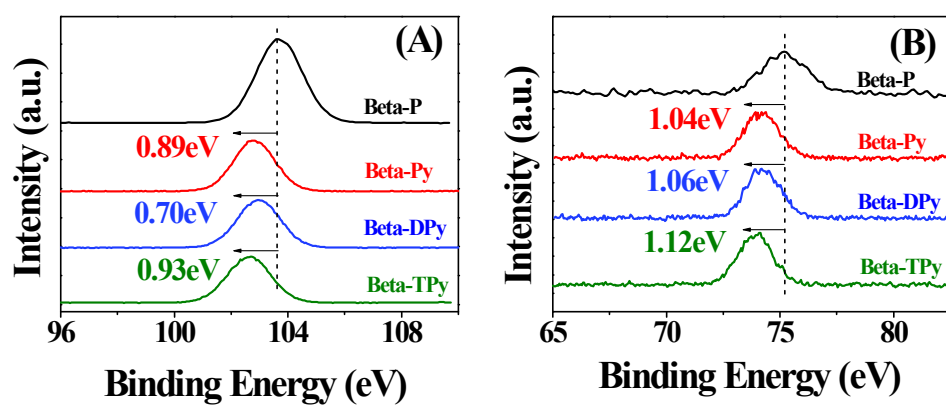

Fig. S6. Si<sub>2</sub>P (A) and Al<sub>2</sub>P (B) XPS of Beta, Beta-Py, Beta-DPy, and Beta-TPy.

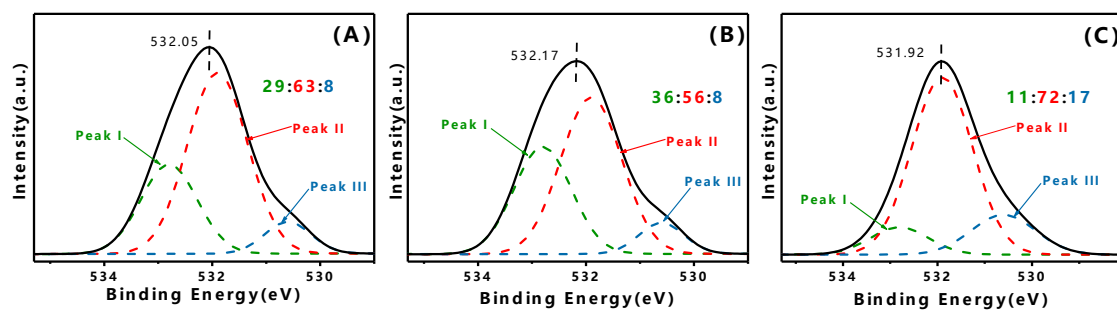

Fig. S7. Fitting results of the O1s XPS spectra of Beta-Py (A), Beta-DPy (B) and Beta-TPy (C).

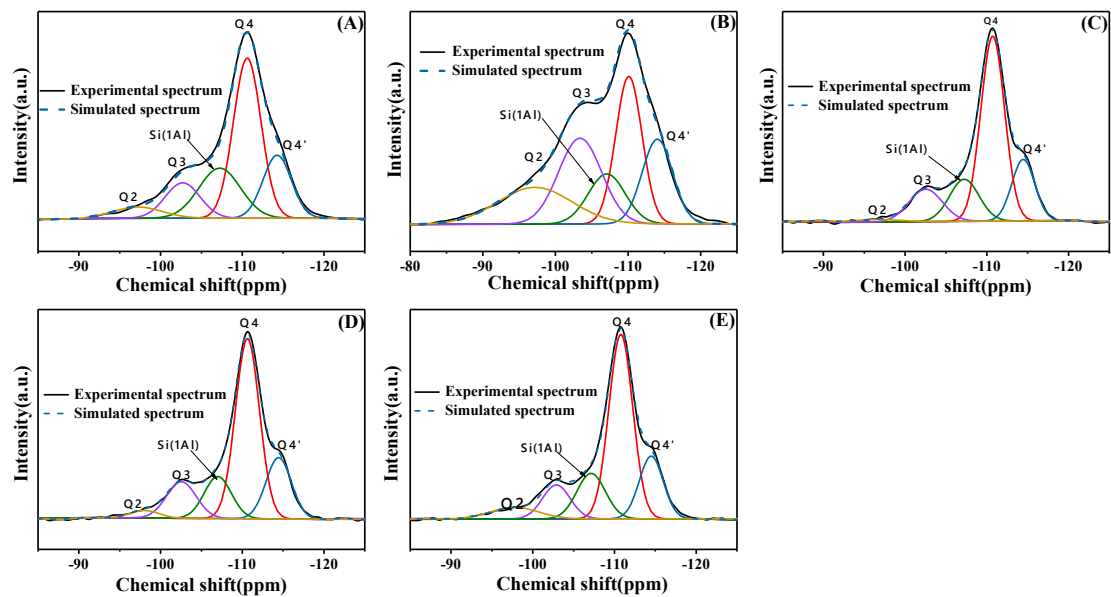

Fig. S8.  $^{29}\text{Si}$  MAS NMR spectra and fitted curves of Beta-P (A), Beta-A(B), Beta-PyC (C), Beta-DPyC (D), And Beta-TPyC (E): Q<sub>2</sub>, (SiO)<sub>2</sub>Si(OH)<sub>2</sub>; Q<sub>3</sub>, (Si)<sub>3</sub>SiOH; Si(1Al), Si(OSi)<sub>3</sub>(OAl); Q<sub>4</sub>, Si(OSi)<sub>4</sub>, and Q<sub>4</sub>', the crystallographically inequivalent Si(OSi)<sub>4</sub> site<sup>1</sup>.



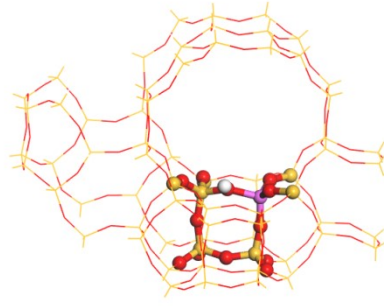

**Fig. S9. Optimized topology structure of Beta molecular sieves.**

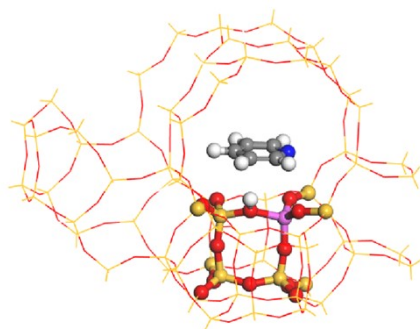

$$E_{ads} = -72 \text{ kJ/mol}$$

**Fig. S10. Adsorption of pyridine molecules on Beta molecular sieves via an interaction between pyridine ring and bridge hydroxyl group.**

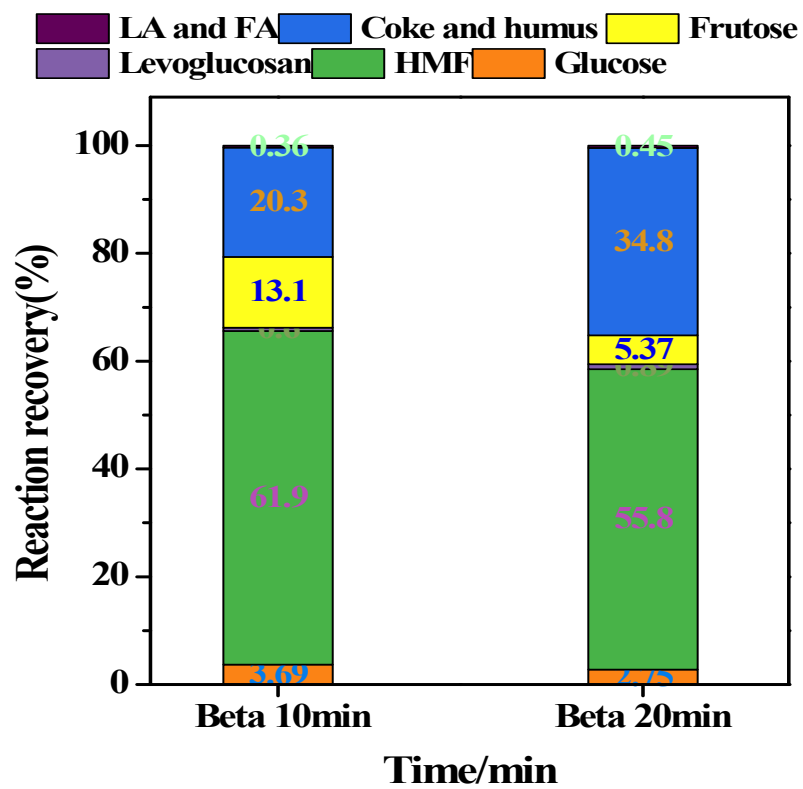

Fig. S11. Product distribution of dehydration reaction of glucose using Beta-P at 150 °C for 10 to 20min.

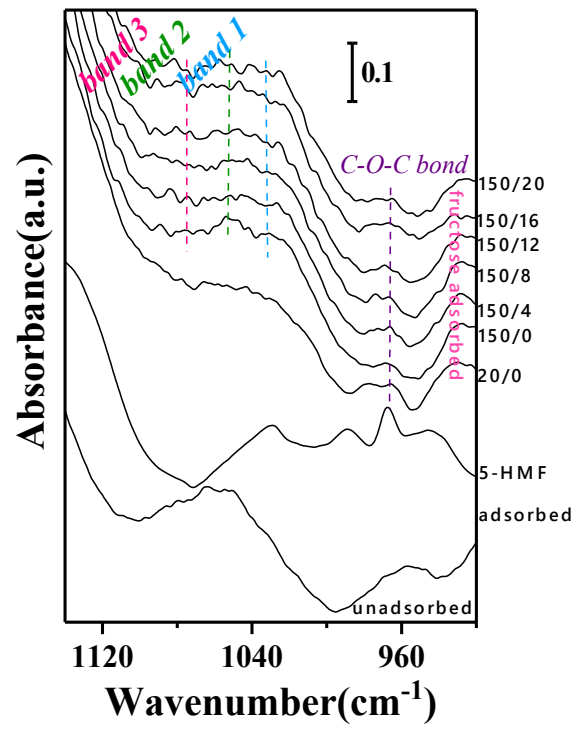

Fig. S12. *In-situ* FTIR spectra of fructose dehydration on Beta-P.

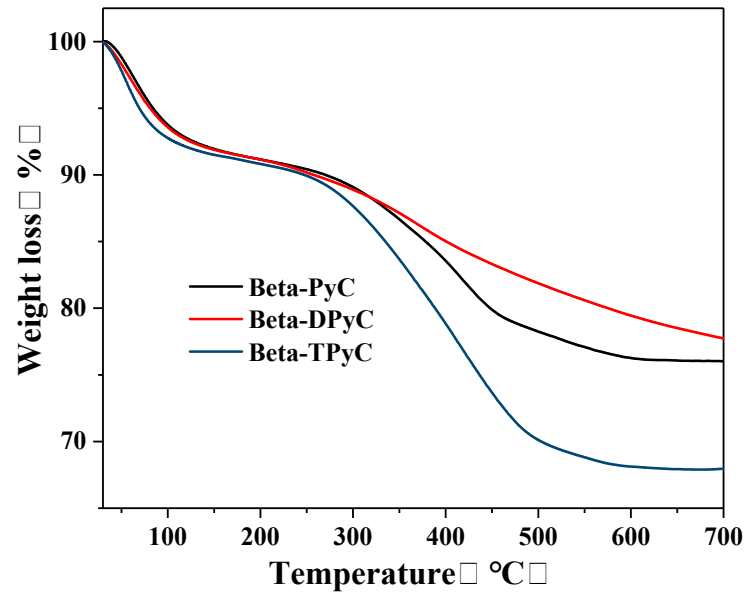

Fig. S13. TG analyzes the carbon deposition of Beta-PyC, Beta-DPyC and Beta-TPyC.

**Table S1. Mulliken charge of atoms.**

| Cluster   | Charge (e) |       |       |       |       |        |        |        |        |
|-----------|------------|-------|-------|-------|-------|--------|--------|--------|--------|
|           | Al         | Si1   | Si2   | Si3   | Si4   | O1     | O2     | O3     | O4     |
| Beta-P    | 2.031      | 2.381 | 2.370 | 2.368 | 2.353 | -1.051 | -1.243 | -1.261 | -1.247 |
| Beta-PyC  | 2.022      | 2.357 | 2.359 | 2.353 | 2.358 | -1.288 | -1.248 | -1.258 | -1.251 |
| Beta-DPyC | 2.033      | 2.357 | 2.358 | 2.352 | 2.353 | -1.296 | -1.244 | -1.255 | -1.250 |
| Beta-TPyC | 2.036      | 2.394 | 2.377 | 2.381 | 2.358 | -1.056 | -1.242 | -1.258 | -1.252 |

**Table S2. Length of Si-O and Al-O bonds.**

| Cluster   | Bond length (nm) |       |       |       |        |        |        |        |
|-----------|------------------|-------|-------|-------|--------|--------|--------|--------|
|           | Al-O1            | Al-O2 | Al-O3 | Al-O4 | Si1-O1 | Si2-O2 | Si3-O3 | Si4-O4 |
| Beta-P    | 1.900            | 1.682 | 1.697 | 1.683 | 1.702  | 1.593  | 1.595  | 1.581  |
| Beta-PyC  | 1.757            | 1.714 | 1.723 | 1.693 | 1.598  | 1.590  | 1.584  | 1.579  |
| Beta-DPyC | 1.757            | 1.710 | 1.725 | 1.698 | 1.597  | 1.589  | 1.579  | 1.580  |
| Beta-TPyC | 1.894            | 1.686 | 1.692 | 1.684 | 1.695  | 1.591  | 1.591  | 1.583  |

1. D. Xiao, S. Xu, N. J. Brownbill, S. Paul, L. H. Chen, S. Pawsey, F. Aussenac, B. L. Su, X. Han,

X. Bao, Z. Liu and F. Blanc, Fast detection and structural identification of carbocations on zeolites

by dynamic nuclear polarization enhanced solid-state NMR, *Chem Sci*, 2018, **9**, 8184-8193.
